# Supplementary material
Source: Royal Society of Chemistry journal article supplement (doi:10.1039/d6cp00900j)
Supplement: d6cp00900j1.pdf [file d6cp00900j1.pdf]

## A Novel Model System for Investigating Molecular Dynamics: Selenosteroids

Izabella Jastrzebska<sup>1\*</sup>, Marta Malinowska<sup>1</sup>, Tomasz Pawlak<sup>2</sup>, Anna Kamińska<sup>3</sup>, Marcin Górecki<sup>3</sup>, Rafał Dolot<sup>2</sup>, Piotr Paluch<sup>2</sup>

<sup>1</sup> Faculty of Chemistry, University of Białystok, Ciołkowskiego 1K, 15-254 Białystok, Poland

<sup>2</sup> Centre of Molecular and Macromolecular Studies, Polish Academy of Sciences, 90-363 Łódź, Sienkiewicza 112, Poland

<sup>3</sup> Institute of Organic Chemistry, Polish Academy of Sciences, Kasprzaka 44/52, 01-224 Warsaw, Poland

E-mail: [i.jastrzebska@uwb.edu.pl](mailto:i.jastrzebska@uwb.edu.pl)

### Supporting information

#### Copies of NMR and MS spectra of **SeSt 2**

|                                                                                                                                                                                                                                                            |      |
|------------------------------------------------------------------------------------------------------------------------------------------------------------------------------------------------------------------------------------------------------------|------|
| <sup>1</sup> H NMR spectrum.....                                                                                                                                                                                                                           | 2    |
| <sup>13</sup> C NMR spectra.....                                                                                                                                                                                                                           | 3, 4 |
| <sup>77</sup> Se NMR spectrum.....                                                                                                                                                                                                                         | 5    |
| IR spectrum.....                                                                                                                                                                                                                                           | 6    |
| ESI-MS.....                                                                                                                                                                                                                                                | 7    |
| Table S1. Crystal structure data collection and refinement parameters.....                                                                                                                                                                                 | 8    |
| Figure S1. ECD spectra of <b>SeSt 1</b> and <b>SeSt 2</b> recorded at 93 K in MI <sub>13</sub> .....                                                                                                                                                       | 9    |
| Table S2. Relative energies and populations at 298 K based on DFT-optimized conformers of <b>SeSt 1</b> and <b>SeSt 2</b> within 0.3 kcal mol <sup>-1</sup> calculated at the ωB97X-D/6-311+G(d,p) level with the three representative torsion angles..... | 10   |
| Figure S2. The stable conformers of rotors <b>SeSt 1</b> and <b>SeSt 2</b> within 0.3 kcal mol <sup>-1</sup> calculated at the ωB97X-D/6-311+G(d,p) level of theory.....                                                                                   | 11   |

# <sup>1</sup>H NMR spectrum of SeSt 2

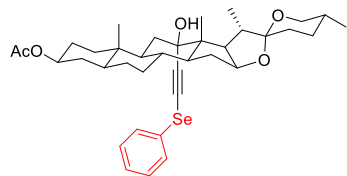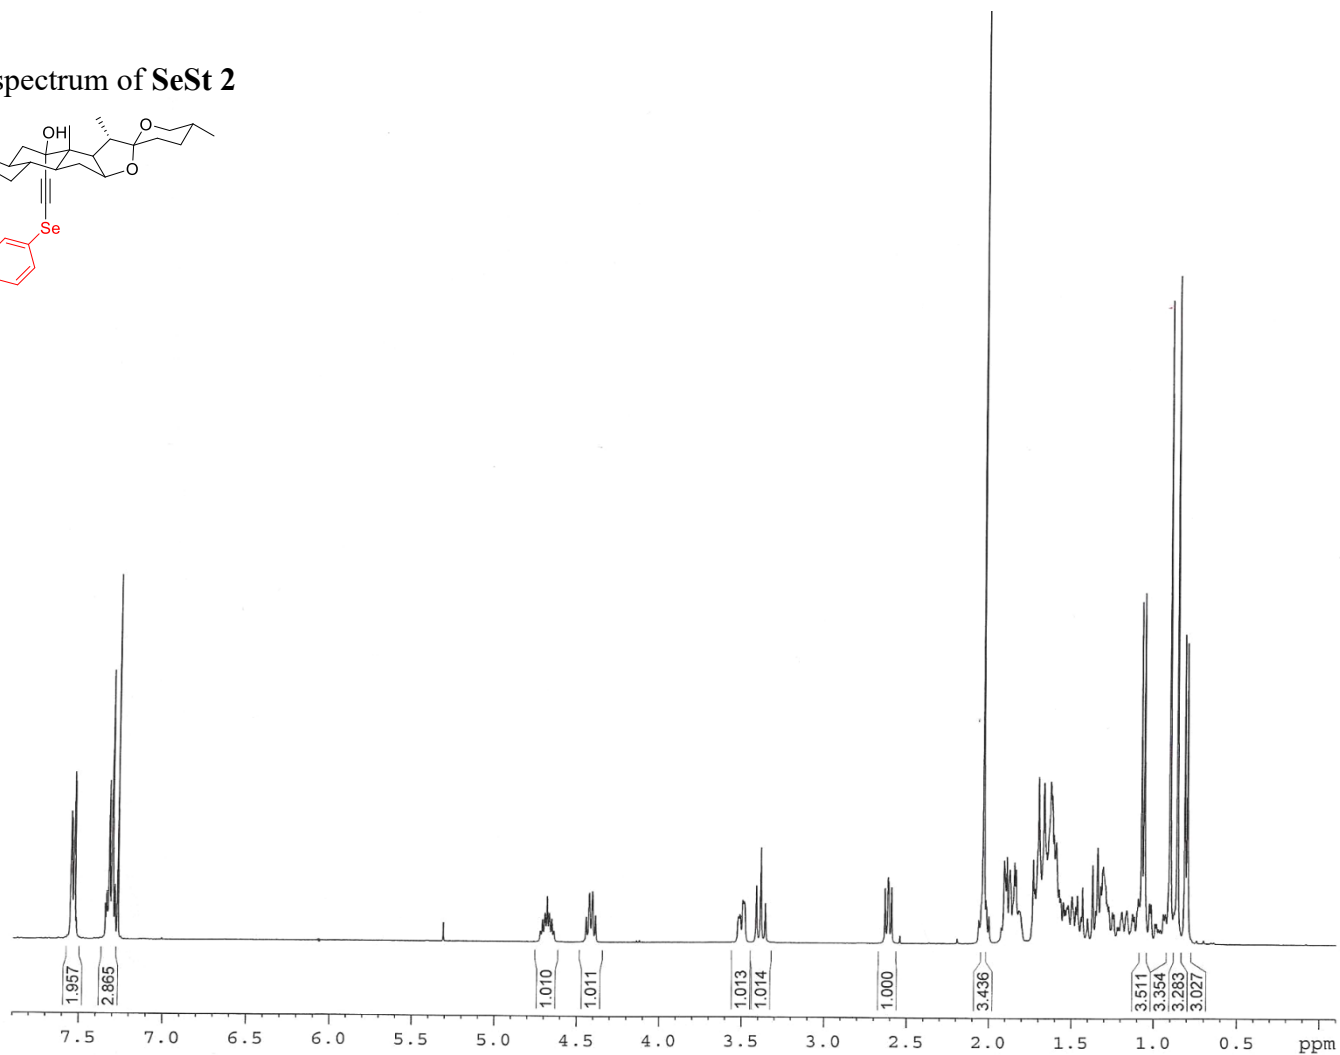

Current Data Parameters  
NAME IJ Iza-625B LC f6-10  
EXPNO 1  
PROCNO 1

F2 - Acquisition Parameters  
Date\_ 20231129  
Time\_ 12.21  
INSTRUM spect  
PROBHD 5 mm PABBO BB-  
PULPROG zg30  
TD 65536  
SOLVENT CDCl3  
NS 400  
DS 0  
SWH 823.685 Hz  
FIDRES 0.125483 Hz  
AQ 3.9846387 sec  
RG 406  
DW 60.800 usec  
DE 8.00 usec  
TE 294.0 K  
D1 1.0000000 sec  
TDO 1

===== CHANNEL f1 =====  
NUC1 1H  
P1 35.00 usec  
PL1 -3.00 dB  
SFO1 400.1524711 MHz

F2 - Processing parameters  
SI 32768  
SF 400.1500000 MHz  
WDW GM  
SSB 0  
LB -0.20 Hz  
GB 0.2  
PC 1.00

<sup>13</sup>C NMR spectrum of SeSt 2

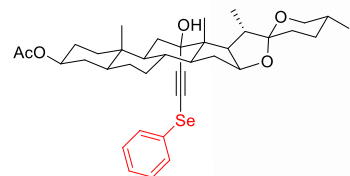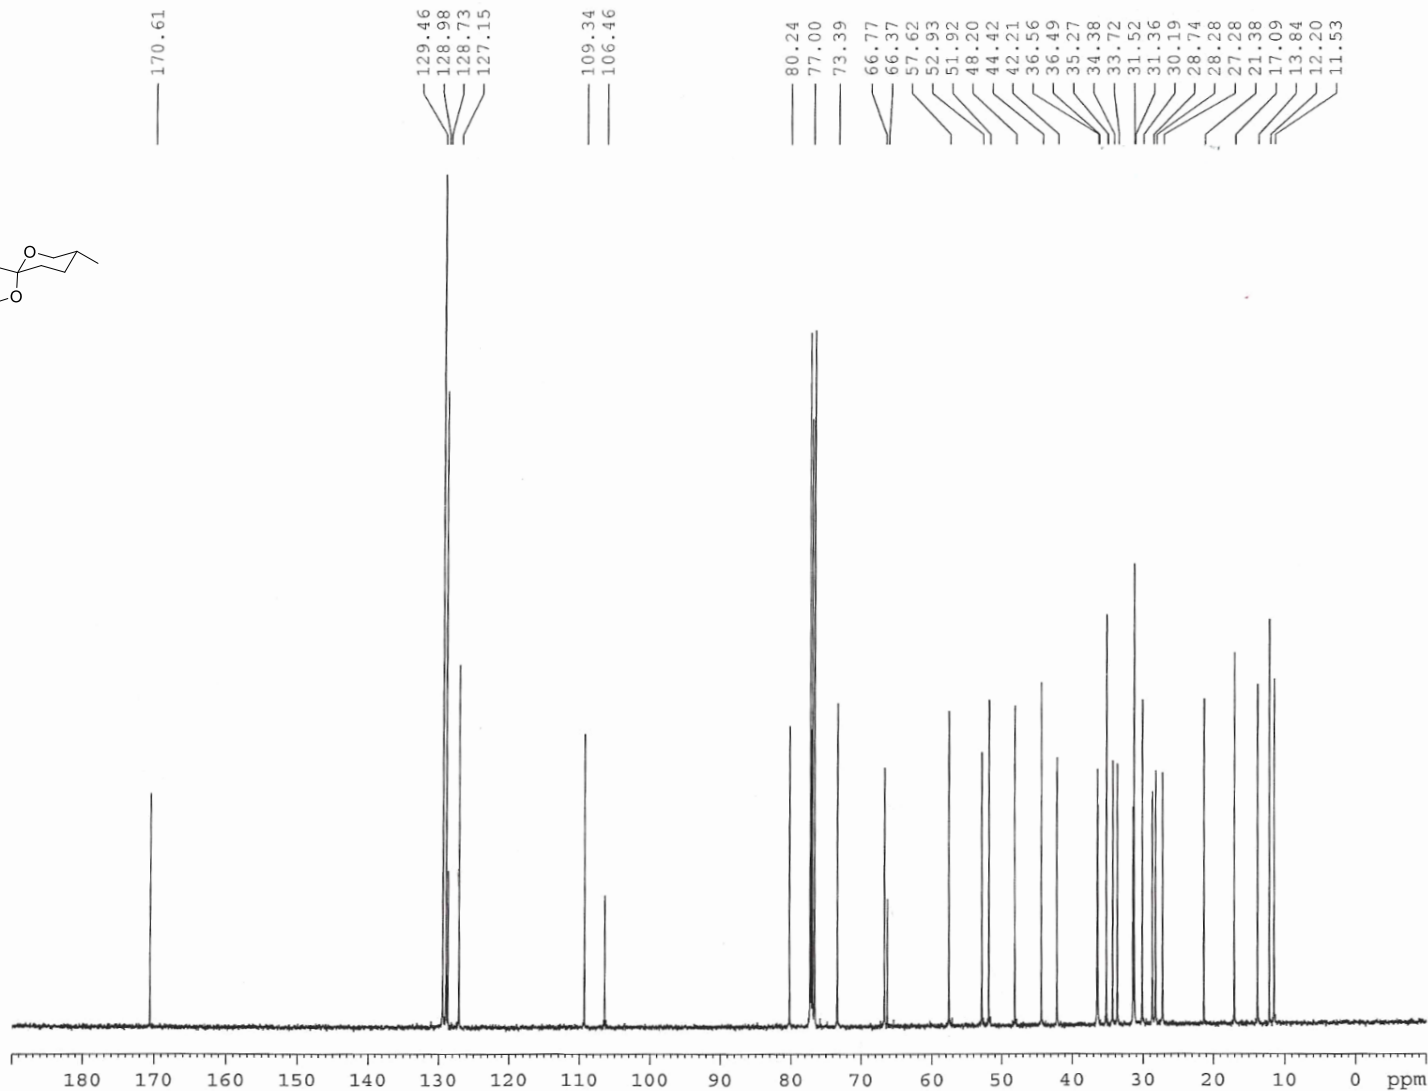

Current Data Parameters  
 NAME IJ Iza-625B LC f6-10  
 EXPNO 2  
 PROCNO 1

F2 - Acquisition Parameters  
 Date\_ 20231201  
 Time\_ 11.16  
 INSTRUM spect  
 PROBHD 5 mm PABBO BB-  
 PULPROG zgpg30  
 TD 65536  
 SOLVENT CDCl3  
 NS 2000  
 DS 4  
 SWH 40760.871 Hz  
 FIDRES 0.621962 Hz  
 AQ 0.8039582 sec  
 RG 2050  
 DW 12.267 usec  
 DE 6.00 usec  
 TE 295.0 K  
 D1 2.0000000 sec  
 d11 0.0300000 sec  
 DELTA 1.89999998 sec  
 TDO 1

===== CHANNEL f1 =====  
 NUC1 13C  
 P1 40.30 usec  
 PL1 -1.00 dB  
 SFO1 100.6298721 MHz

===== CHANNEL f2 =====  
 CPDPRG2 waltz16  
 NUC2 1H  
 PCPD2 130.00 usec  
 PL2 -3.00 dB  
 PL12 3.65 dB  
 PL13 5.00 dB  
 SFO2 400.1516006 MHz

F2 - Processing parameters  
 SI 32768  
 SF 100.6178063 MHz  
 WDW EM  
 SSB 0  
 LB 1.00 Hz  
 GB 0  
 PC 1.40

# <sup>13</sup>C NMR spectrum of SeSt 2

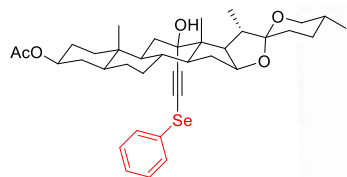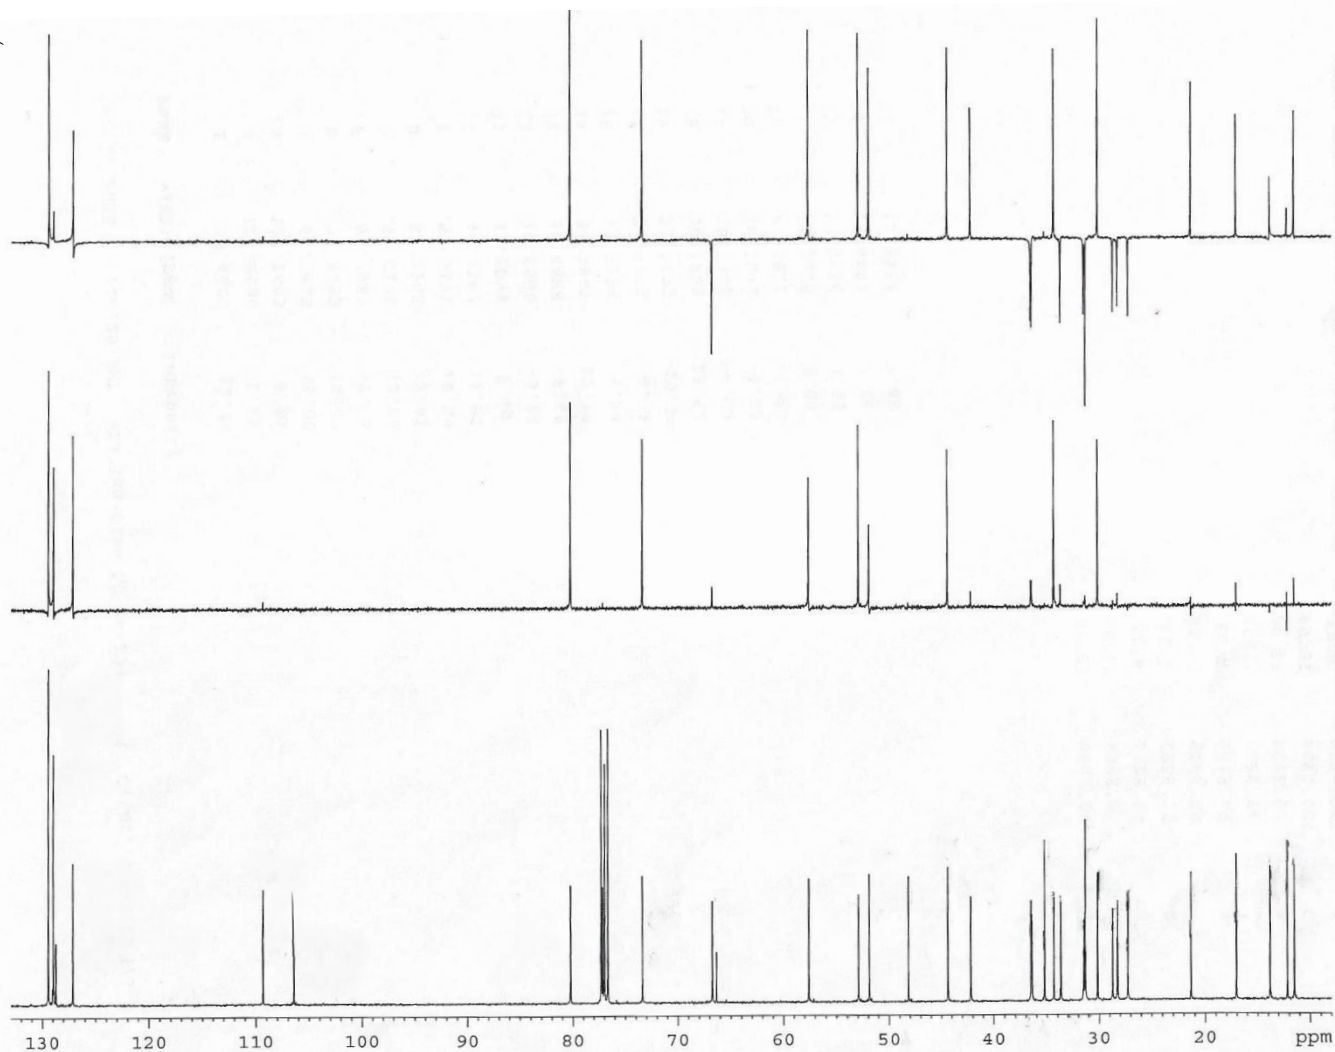

Current Data Parameters  
NAME IJ Iza-625B LC f6-10  
EXPNO 4  
PROCNO 1

F2 - Acquisition Parameters  
Date 20231201  
Time 12.02  
INSTRUM spect  
PROBHD 5 mm PABBO BB-  
PULPROG dept135  
TD 65536  
SOLVENT CDCl3  
NS 500  
DS 4  
SWH 40760.871 Hz  
FIDRES 0.621962 Hz  
AQ 0.8039582 sec  
RG 2050  
DW 12.267 usec  
DE 6.00 usec  
TE 295.0 K  
CNST2 145.0000000  
D1 2.0000000 sec  
d2 0.00344828 sec  
d12 0.00002000 sec  
DELTA 0.00005131 sec  
TD0 1

----- CHANNEL f1 -----  
NUC1 13C  
P1 40.30 usec  
p2 80.60 usec  
PL1 -1.00 dB  
SFO1 100.6238351 MHz

----- CHANNEL f2 -----  
CPDPRG2 waltz16  
NUC2 1H  
P3 60.00 usec  
p4 120.00 usec  
PCPD2 130.00 usec  
PL2 -3.00 dB  
PL12 1.65 dB  
SFO2 400.1516006 MHz

F2 - Processing parameters  
SI 32768  
SF 100.6178063 MHz  
WDW EM  
SSB 0  
LB 1.00 Hz  
GB 0  
PC 1.40

<sup>77</sup>Se NMR spectrum of SeSt 2

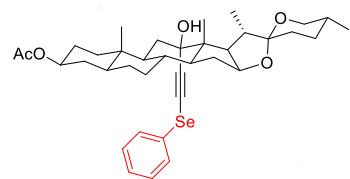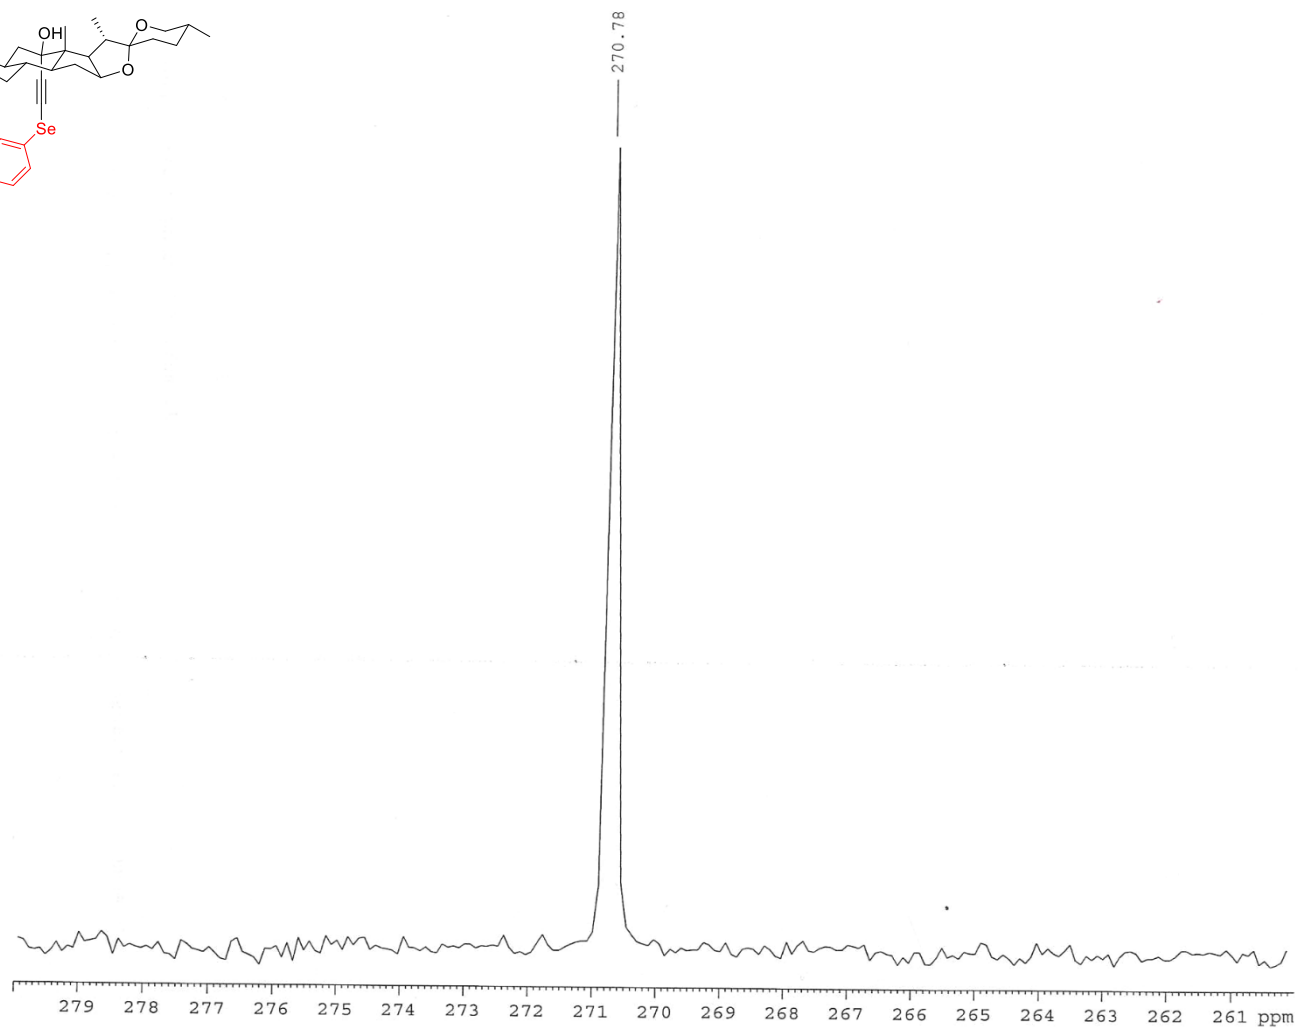

```
Current Data Parameters
NAME      IJ Iza-625B
EXPNO     8
PROCNO    1

F2 - Acquisition Parameters
Date_     20240724
Time      18.32
INSTRUM   spect
PROBHD    5 mm PABBO BB-
PULPROG   zg
TD         65536
SOLVENT   CDCl3
NS         29180
DS         4
SWH        217391.297 Hz
FIDRES     3.317128 Hz
AQ         0.1507828 sec
RG         2050
DW         2.300 usec
DE         6.00 usec
TE         0.0 K
D1         2.00000000 sec
TDO        1

===== CHANNEL f1 =====
NUC1       77Se
P1         35.00 usec
PL1        1.00 dB
SFO1       76.3146590 MHz

F2 - Processing parameters
SI         32768
SF         76.3146808 MHz
WDW        EM
SSB        0
LB         3.00 Hz
GB         0
PC         1.40
```

# IR spectrum of SeSt 2

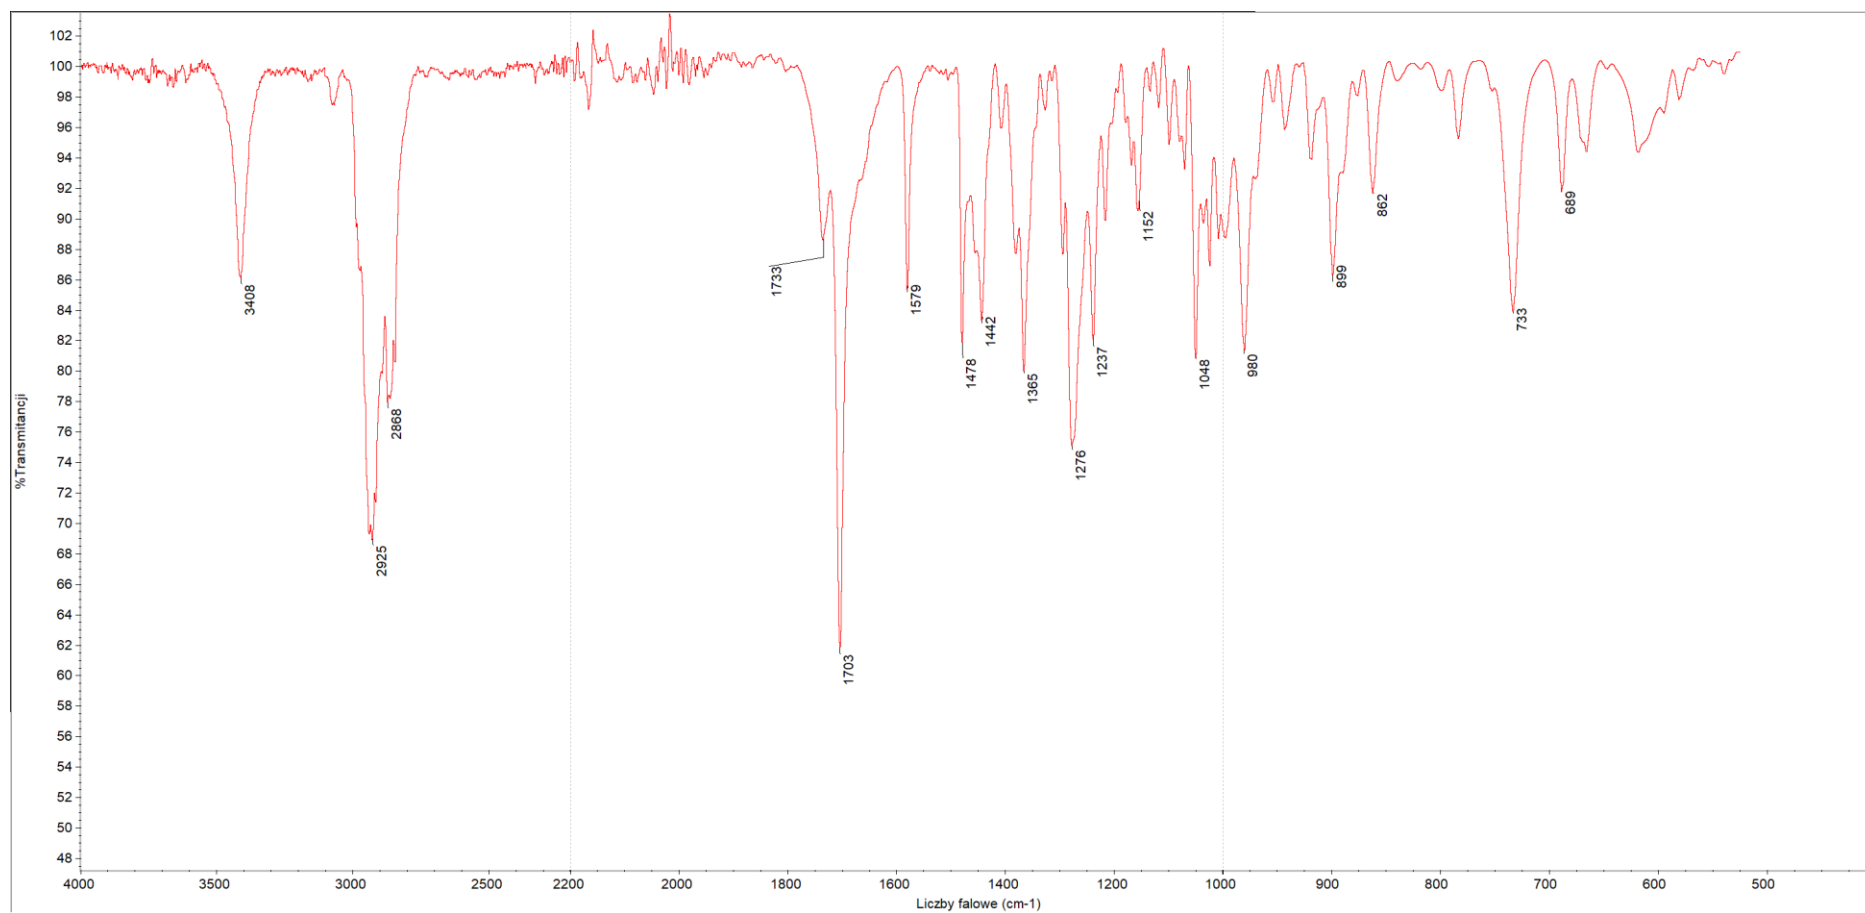



**Table S1.** Crystal structure, data collection and refinement parameters of the **SeSt 1** and **SeSt 2** studied in this research.

| Compound                                                                 | SeSt 1                                            | SeSt 2                                            |
|--------------------------------------------------------------------------|---------------------------------------------------|---------------------------------------------------|
| <b>Crystal data</b>                                                      |                                                   |                                                   |
| CCDC                                                                     | 2453626                                           | 2453627                                           |
| Chemical formula                                                         | C <sub>37</sub> H <sub>50</sub> O <sub>5</sub> Se | C <sub>37</sub> H <sub>50</sub> O <sub>5</sub> Se |
| Formula weight                                                           | 653.73                                            | 653.73                                            |
| Crystal system                                                           | Monoclinic                                        | Monoclinic                                        |
| Space group                                                              | <i>P</i> 2 <sub>1</sub>                           | <i>P</i> 2 <sub>1</sub>                           |
| Temperature (K)                                                          | 99.99(10)                                         | 100.00(10)                                        |
| <i>a</i> [Å]                                                             | 15.9668(1)                                        | 13.4375(3)                                        |
| <i>b</i> [Å]                                                             | 14.1741(1)                                        | 7.2022(2)                                         |
| <i>c</i> [Å]                                                             | 29.7960(2)                                        | 18.0356(5)                                        |
| $\alpha$ [°]                                                             | 90                                                | 90                                                |
| $\beta$ [°]                                                              | 93.898(1)                                         | 105.267(2)                                        |
| $\gamma$ [°]                                                             | 90                                                | 90                                                |
| <i>V</i> [Å <sup>3</sup> ]                                               | 6727.68(8)                                        | 1683.88(8)                                        |
| <i>Z</i>                                                                 | 8                                                 | 2                                                 |
| <i>Z'</i>                                                                | 4                                                 | 1                                                 |
| <i>d</i> <sub>calc</sub> [g/cm <sup>3</sup> ]                            | 1.291                                             | 1.289                                             |
| Crystal dimensions [mm]                                                  | 0.60 × 0.10 × 0.05                                | 0.95 × 0.10 × 0.03                                |
| Radiation type                                                           | CuK $\alpha$                                      | CuK $\alpha$                                      |
| $\mu$ [mm <sup>-1</sup> ]                                                | 1.829                                             | 1.827                                             |
| <b>Data collection</b>                                                   |                                                   |                                                   |
| Reflections measured                                                     | 103082                                            | 25149                                             |
| Range/indices ( <i>h</i> , <i>k</i> , <i>l</i> )                         | -20, 20<br>-17, 16<br>-36, 37                     | -16, 16<br>-8, 9<br>-22, 19                       |
| $\theta$ (max, min) [°]                                                  | 77.047, 2.774                                     | 77.224, 2.539                                     |
| Total no. of unique data                                                 | 25936                                             | 6387                                              |
| No. of observed data, <i>I</i> > 2 $\sigma$ ( <i>I</i> )                 | 24722                                             | 5814                                              |
| <i>R</i> <sub>int</sub>                                                  | 0.059                                             | 0.090                                             |
| <b>Refinement</b>                                                        |                                                   |                                                   |
| <i>R</i> [ <i>F</i> <sup>2</sup> > 2 $\sigma$ ( <i>F</i> <sup>2</sup> )] | 0.079                                             | 0.094                                             |
| <i>wR</i> ( <i>F</i> <sup>2</sup> )                                      | 0.211                                             | 0.218                                             |
| <i>S</i>                                                                 | 1.092                                             | 1.170                                             |
| No. of reflections                                                       | 25936                                             | 6387                                              |
| No. of parameters                                                        | 1569                                              | 389                                               |
| No. of restraints                                                        | 1                                                 | 1                                                 |
| H-atom treatment                                                         | <u>H atoms treated by constrained refinement</u>  | <u>H atoms treated by constrained refinement</u>  |
| $\Delta\rho$ (min, max), e/Å <sup>3</sup>                                | -1.01/1.55                                        | -0.91/2.26                                        |

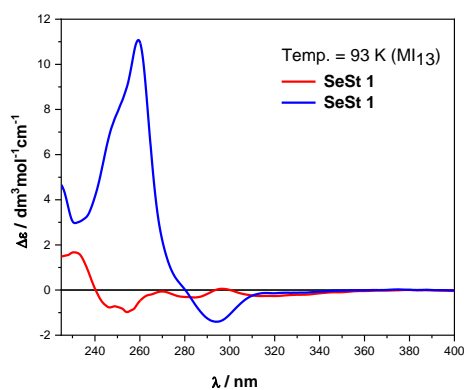

**Figure S1.** ECD spectra of **SeSt 1** and **SeSt 2** recorded at 93 K in  $MI_{13}$ .

**Table S2.** Relative energies and populations at 298 K based on DFT-optimized conformers of **SeSt 1** and **SeSt 2** within 1 kcal mol<sup>-1</sup> calculated at the  $\omega B97X-D/6-311+G(d,p)$  level with the three representative torsion angles.

| Conf.               | $\Delta E$ / kcal mol <sup>-1</sup> | Pop. / % | $\alpha$ / deg | $\beta$ / deg | C36–O4–C3–C2 / deg |
|---------------------|-------------------------------------|----------|----------------|---------------|--------------------|
| <b>Rotor SeSt 1</b> |                                     |          |                |               |                    |
| <b>SeSt 1a</b>      | 0.00                                | 45.10    | -5.8           | +122.1        | +155.2             |
| <b>SeSt 1b</b>      | 0.10                                | 38.18    | -5.0           | +122.1        | +83.2              |
| <b>SeSt 1c</b>      | 0.59                                | 16.71    | -6.1           | +120.1        | +83.0              |
| <b>Rotor SeSt 2</b> |                                     |          |                |               |                    |
| <b>SeSt 2a</b>      | 0.00                                | 43.45    | +13.8          | +89.8         | +85.7              |
| <b>SeSt 2b</b>      | 0.37                                | 23.08    | +8.3           | +100.2        | +90.6              |
| <b>SeSt 2c</b>      | 0.40                                | 21.94    | +10.0          | +97.7         | +150.3             |
| <b>SeSt 2d</b>      | 0.78                                | 11.54    | +3.8           | +97.6         | +91.1              |

#### Rotor SeSt 1

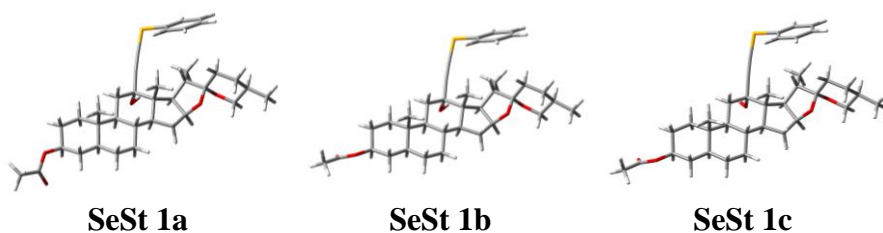

#### Rotor SeSt 2

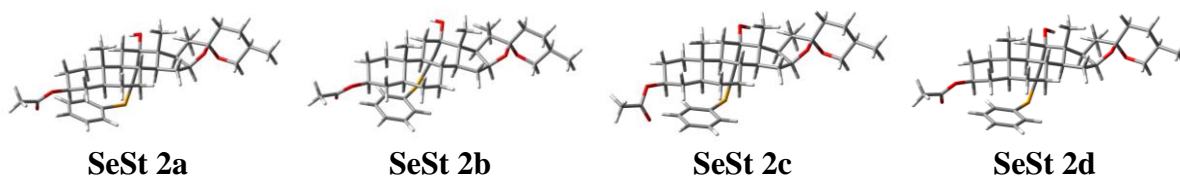

**Figure S2.** The stable conformers of rotors **SeSt 1** and **SeSt 2** within 1 kcal/mol calculated at the  $\omega B97X-D/6-311+G(d,p)$  level of theory.
